# Supplementary material for: Lipopolysaccharide Diversity Evolving in Helicobacter pylori Communities through Genetic Modifications in Fucosyltransferases
Source: PLoS One. 2008 Nov 26;3(11):e3811. doi: 10.1371/journal.pone.0003811 (PMC2583950; doi:10.1371/journal.pone.0003811)
Supplement: Figure S2 — DNA sequence of the futA and futB genes from five single-colony isolates. The complete futA and futB genes were sequenced in subisolates 67:18, 67:19, 67:20, 67:21 and 67:27. A total of 118 nucleotide positions were found to differ in at least one isolate. This calculation excludes the sequence between positions 1138–1452 that encode heptad-repeats that are not shared by all the isolates, i.e. only the first two repeat units that were common for all strains are included. (0.23 MB PDF) [file pone.0003811.s002.pdf]

(1) 1 10 20 30 40 50 60 70 80 90 100  
futA 67:18 (1) ATGTTCCAACCCCTTACTAGACGCCTTTATAGAAAGCGCTCCAAATTAATAAATAAATTAACCTTTAAATCTCCCCCCCCCCCCCTAAAAATCGCTGTGGCGA  
futA 67:19 (1) ATGTTCCAACCCCTTACTAGACGCCTTTATAGAAAGCGCTCCAAATTAATAAATAAATTAACCTTTAAATCTCCCCCCCCCCCCCTAAAAATCGCTGTGGCGA  
futA 67:20 (1) ATGTTCCAACCCCTTACTAGACGCCTTCATAGAAAGCGCTTCATTGAAAAA--ATGGCCTCTAAATCTCCCCCCCCCCCCCTAAAAATCGCTGTGGCGA  
futA 67:21 (1) ATGTTCCAACCCCTTACTAGACGCCTTTATAGAAAGCGCTCCAAATTAATAAATAAATTAACCTTTAAATCTCCCCCCCCCCCCCTAAAAATCGCTGTGGCGA  
futA 67:27 (1) ATGTTCCAACCCCTTACTAGACGCCTTCATAGAAAGCGCTTCATTGAAAAA--ATGGCCTCTAAATCTCCCCCCCCCCCCCTAAAAATCGCTGTGGCGA  
futB 67:18 (1) ATGTTCCAACCCCTTACTAGACGCCTTCATAGAAAGCGCTTCATTGAAAAA--ATGGCCTCTAAATCTCCCCCCCCCCCCCTAAAAATCGCTGTGGCGA  
futB 67:19 (1) ATGTTCCAACCCCTTACTAGACGCCTTCATAGAAAGCGCTTCATTGAAAAA--ATGGCCTCTAAATCTCCCCCCCCCCCCCTAAAAATCGCTGTGGCGA  
futB 67:20 (1) ATGTTCCAACCCCTTACTAGACGCCTTCATAGAAAGCGCTTCATTGAAAAA--ATGGCCTCTAAATCTCCCCCCCCCCCCCTAAAAATCGCTGTGGCGA  
futB 67:21 (1) ATGTTCCAACCCCTTACTAGACGCCTTCATAGAAAGCGCTTCATTGAAAAA--ATGGCCTCTAAATCTCCCCCCCCCCCCCTAAAAATCGCTGTGGCGA  
futB 67:27 (1) ATGTTCCAACCCCTTACTAGACGCCTTCATAGAAAGCGCTTCATTGAAAAA--ATGGCCTCTAAATCTCCCCCCCCCCCCCTAAAAATCGCTGTGGCGA

(101) 101 110 120 130 140 150 160 170 180 190 200  
futA 67:18 (101) ATTGGTGGGAGGC-----GCTGAAGAATTTAAAAAGAGGACTTTATATTTATCTTAAGCCAACGCTACACAATCACCTCCACCAAACCCCAACAA  
futA 67:19 (100) ATTGGTGGGAGGC-----GCTGAAGAATTTAAAAAGAGGACTTTATATTTATCTTAAGCCAACGCTACACAATCACCTCCACCAAACCCCAACAA  
futA 67:20 (97) ATTGGTGGAGAGATAAAGAGCTTAAGAATTTAAAAAGAGGCTTCTTTATTTATCTTAAGCCAACGCTACACAATCACCTCCACCAAACCCCAACAA  
futA 67:21 (99) ATTGGTGGAGAGC-----GCTGAAGAATTTAAAAAGAGGACTTTATATTTATCTTAAGCCAACGCTACACAATCACCTCCACCAAACCCCAACAA  
futA 67:27 (97) ATTGGTGGAGAGATAAAGAGCTTAAGAATTTAAAAAGAGGCTTCTTTATTTATCTTAAGCCAACGCTACACAATCACCTCCACCAAACCCCAACAA  
futB 67:18 (98) ATTGGTGGAGAGATAAAGAGCTTAAGAATTTAAAAAGAGGCTTCTTTATTTATCTTAAGCCAACGCTACACAATCACCTCCACCAAACCCCAACAA  
futB 67:19 (98) ATTGGTGGAGAGATAAAGAGCTTAAGAATTTAAAAAGAGGCTTCTTTATTTATCTTAAGCCAACGCTACACAATCACCTCCACCAAACCCCAACAA  
futB 67:20 (98) ATTGGTGGGAGGC-----GCTGAAGAATTTAAAAAGAGGACTCTGTTATTTATCTTAAGCCAACGCTACACAATCACCTCCACCAAACCCCAACAA  
futB 67:21 (98) ATTGGTGGAGAGATAAAGAGCTTAAGAATTTAAAAAGAGGCTTCTTTATTTATCTTAAGCCAACGCTACACAATCACCTCCACCAAACCCCAACAA  
futB 67:27 (98) ATTGGTGGGAGGC-----GCTGAAGAATTTAAAAAGAGGACTCTGTTATTTATCTTAAGCCAACGCTACACAATCACCTCCACCAAACCCCAACAA

(201) 201 210 220 230 240 250 260 270 280 290 300  
futA 67:18 (195) ACCCTCCGATCTCGTCTTTGGCAGTCCTATTGGATCAGCCAGAAAAATCTATCCTATCAAAACACTAAACAGAGTGTTCACACAGGTGAAATGAAGTC  
futA 67:19 (194) ACCCTCCGATCTCGTCTTTGGCAGTCCTATTGGATCAGCCAGAAAAATCTATCCTATCAAAACACTAAACAGAGTGTTCACACAGGTGAAATGAAGTC  
futA 67:20 (197) ACCCTCCGATCTCGTCTTTGGCAGTCCTATTGGATCAGCTAGAAAAATCTTATCCTATCAAAACACTAAACAGGTGTTCACACAGGTGAGAACGAAGTC  
futA 67:21 (193) ACCCTCCGATCTCGTCTTTGGCAGTCCTATTGGATCAGCTAGAAAAATCTTATCCTATCAAAACACTAAACAGGTGTTCACACAGGTGAGAACGAAGTC  
futA 67:27 (197) ACCCTCCGATCTCGTCTTTGGCAGTCCTATTGGATCAGCTAGAAAAATCTTATCCTATCAAAACACTAAACAGGTGTTCACACAGGTGAGAACGAAGTC  
futB 67:18 (198) ACCCTCCGATCTCGTCTTTGGCAGTCCTATTGGATCAGCTAGAAAAATCTTATCCTATCAAAACACTAAACAGGTGTTCACACAGGTGAGAACGAAGTC  
futB 67:19 (198) ACCCTCCGATCTCGTCTTTGGCAGTCCTATTGGATCAGCTAGAAAAATCTTATCCTATCAAAACACTAAACAGGTGTTCACACAGGTGAGAACGAAGTC  
futB 67:20 (192) ACCCTCCGATCTCGTCTTTGGCAGTCCTATTGGATCAGCTAGAAAAATCTTATCCTATCAAAACACTAAACAGGTGTTCACACAGGTGAGAACGAAGTC  
futB 67:21 (198) ACCCTCCGATCTCGTCTTTGGCAGTCCTATTGGATCAGCTAGAAAAATCTTATCCTATCAAAACACTAAACAGGTGTTCACACAGGTGAGAACGAAGTC  
futB 67:27 (192) ACCCTCCGATCTCGTCTTTGGCAGTCCTATTGGATCAGCTAGAAAAATCTTATCCTATCAAAACACTAAACAGGTGTTCACACAGGTGAGAACGAAGTC

(301) 301 310 320 330 340 350 360 370 380 390 400  
futA 67:18 (295) CCTAATTTCAACCTCTTTGATTACGCCATAGGCTTTGATGAATTGAGCTTTAGAGATCGTTATTTGAGAATGCCTTTATATTATGATAGACTACACCATA  
futA 67:19 (294) CCTAATTTCAACCTCTTTGATTACGCCATAGGCTTTGATGAATTGAGCTTTAGAGATCGTTATTTGAGAATGCCTTTATATTATGATAGACTACACCATA  
futA 67:20 (297) CCTAATTTCAACCTCTTTGATTACGCCATAGGCTTTGATGAATTGAGCTTTAGAGATCGTTATTTGAGAATGCCTTTATATTATGATAGACTACACCATA  
futA 67:21 (293) CCTAATTTCAACCTCTTTGATTACGCCATAGGCTTTGATGAATTGAGCTTTAGAGATCGTTATTTGAGAATGCCTTTATATTATGATAGACTACACCATA  
futA 67:27 (297) CCTAATTTCAACCTCTTTGATTACGCCATAGGCTTTGATGAATTGAGCTTTAGAGATCGTTATTTGAGAATGCCTTTATATTATGATAGACTACACCATA  
futB 67:18 (298) CCTAATTTCAACCTCTTTGATTACGCCATAGGCTTTGATGAATTGAGCTTTAGAGATCGTTATTTGAGAATGCCTTTATATTATGATAGACTACACCATA  
futB 67:19 (298) CCTAATTTCAACCTCTTTGATTACGCCATAGGCTTTGATGAATTGAGCTTTAGAGATCGTTATTTGAGAATGCCTTTATATTATGATAGACTACACCATA  
futB 67:20 (292) CCTAATTTCAACCTCTTTGATTACGCCATAGGCTTTGATGAATTGAGCTTTAGAGATCGTTATTTGAGAATGCCTTTATATTATGATAGACTACACCATA  
futB 67:21 (298) CCTAATTTCAACCTCTTTGATTACGCCATAGGCTTTGATGAATTGAGCTTTAGAGATCGTTATTTGAGAATGCCTTTATATTATGATAGACTACACCATA  
futB 67:27 (292) CCTAATTTCAACCTCTTTGATTACGCCATAGGCTTTGATGAATTGAGCTTTAGAGATCGTTATTTGAGAATGCCTTTATATTATGATAGACTACACCATA

(401) 401 410 420 430 440 450 460 470 480 490 500  
futA 67:18 (395) AAGCAGAGAGCGTGAATGACACCACCGCCCTTACAAGATTAAAGATAACAGCCCTTTATCTTTAAAAAAACCCACCCATTTGTTTTAAAGAAAACCCACC  
futA 67:19 (394) AAGCAGAGAGCGTGAATGACACCACCGCCCTTACAAGATTAAAGATAACAGCCCTTTATCTTTAAAAAAACCCCTCCCATTTGTTTTAAAGAAAACCCACC  
futA 67:20 (397) AAGCAGAGAGCGTGAATGACACCACCGCCCTTACAAGATTAAAGATAACAGCCCTTTATCTTTAAAAAAACCCACCCATTTGTTTTAAAGAAAACCCACC  
futA 67:21 (393) AAGCAGAGAGCGTGAATGACACCACCGCCCTTACAAGATTAAAGATAACAGCCCTTTATCTTTAAAAAAACCCCTCCCATTTGTTTTAAAGAAAACCCACC  
futA 67:27 (397) AAGCAGAGAGCGTGAATGACACCACCGCCCTTACAAGATTAAAGATAACAGCCCTTTATCTTTAAAAAAACCCACCCATTTGTTTTAAAGAAAACCCACC  
futB 67:18 (398) AAGCAGAGAGCGTGAATGACACCACCGCCCTTACAAGATTAAAGATAACAGCCCTTTATCTTTAAAAAAACCCACCCATTTGTTTTAAAGAAAACCCACC  
futB 67:19 (398) AAGCAGAGAGCGTGAATGACACCACCGCCCTTACAAGATTAAAGATAACAGCCCTTTATCTTTAAAAAAACCCCTCCCATTTGTTTTAAAGAAAACCCACC  
futB 67:20 (392) AAGCAGAGAGCGTGAATGACACCACCGCCCTTACAAGATTAAAGATAACAGCCCTTTATCTTTAAAAAAACCCCTCCCATTTGTTTTAAAGAAAACCCACC  
futB 67:21 (398) AAGCAGAGAGCGTGAATGACACCACCGCCCTTACAAGATTAAAGATAACAGCCCTTTATCTTTAAAAAAACCCACCCATTTGTTTTAAAGAAAACCCACC  
futB 67:27 (392) AAGCAGAGAGCGTGAATGACACCACCGCCCTTACAAGATTAAAGATAACAGCCCTTTATCTTTAAAAAAACCCCTCCCATTTGTTTTAAAGAAAACCCACC

(501) 501 510 520 530 540 550 560 570 580 590 600  
futA 67:18 (495) CCATTTATGCGCAGTAGTGAATAATGAGAGCGATCCTTTGAAAAGAGGGTTTGCCAGTTTGTGCGTAGCAACCCCTAACGCCCTTAAAGAAAACCGCTTTC  
futA 67:19 (494) CCATTTATGCGCAGTAGTGAATAATGAGAGCGATCCTTTGAAAAGAGGGTTTGCCAGTTTGTGCGTAGCAACCCCTAACGCCCTTAAAGAAAACCGCTTTC  
futA 67:20 (497) CCATTTATGCGCAGTAGTGAATAATGAGAGCGATCCTTTGAAAAGAGGGTTTGCCAGTTTGTGCGTAGCAACCCCTAACGCCCTTAAAGAAAACCGCTTTC  
futA 67:21 (493) CCATTTATGTCGAGTAGTGAATAATGAGAGCGATCCTTTGAAAAGAGGGTTTGCCAGTTTGTGCGTAGCAACCCCTAACGCCCTTAAAGAAAACCGCTTTC  
futA 67:27 (497) CCATTTATGCGCAGTAGTGAATAATGAGAGCGATCCTTTGAAAAGAGGGTTTGCCAGTTTGTGCGTAGCAACCCCTAACGCCCTTAAAGAAAACCGCTTTC  
futB 67:18 (498) CCATTTATGCGCAGTAGTGAATAATGAGAGCGATCCTTTGAAAAGAGGGTTTGCCAGTTTGTGCGTAGCAACCCCTAACGCCCTTAAAGAAAACCGCTTTC  
futB 67:19 (498) CCATTTATGCGCAGTAGTGAATAATGAGAGCGATCCTTTGAAAAGAGGGTTTGCCAGTTTGTGCGTAGCAACCCCTAACGCCCTTAAAGAAAACCGCTTTC  
futB 67:20 (492) CCATTTATGTCGAGTAGTGAATAATGAGAGCGATCCTTTGAAAAGAGGGTTTGCCAGTTTGTGCGTAGCAACCCCTAACGCCCTTAAAGAAAACCGCTTTC  
futB 67:21 (498) CCATTTATGCGCAGTAGTGAATAATGAGAGCGATCCTTTGAAAAGAGGGTTTGCCAGTTTGTGCGTAGCAACCCCTAACGCCCTTAAAGAAAACCGCTTTC  
futB 67:27 (492) CCATTTATGCGCAGTAGTGAATAATGAGAGCGATCCTTTGAAAAGAGGGTTTGCCAGTTTGTGCGTAGCAACCCCTAACGCCCTTAAAGAAAACCGCTTTC



|                  | (1201) | 1201                                                                        | 1210 | 1220 | 1230 | 1240 | 1250 | 1260 | 1270 | 1280 | 1290 | 1300 |  |
|------------------|--------|-----------------------------------------------------------------------------|------|------|------|------|------|------|------|------|------|------|--|
| futA 67:18(1195) |        | -----                                                                       |      |      |      |      |      |      |      |      |      |      |  |
| futA 67:19(1131) |        | -----                                                                       |      |      |      |      |      |      |      |      |      |      |  |
| futA 67:20(1197) |        | GATGATTGAGGGTTAATTATGATGATTGAGGGTTAATTATGATGATTGAGGGTTAATTATGATGATTGAGGGTTA |      |      |      |      |      |      |      |      |      |      |  |
| futA 67:21(1130) |        | -----                                                                       |      |      |      |      |      |      |      |      |      |      |  |
| futA 67:27(1197) |        | GATGATTGAGGGTTAATTATGATGATTGAGGGTTAATTATGATGATTGAGGGTTAATTATGATGATTGAGGGTTA |      |      |      |      |      |      |      |      |      |      |  |
| futB 67:18(1198) |        | GATGATTGAGGGTTAATTATGATGATTGAGGGTTAATTATGATGATTGAGGGTTAATTATGATGATTGAGGGTTA |      |      |      |      |      |      |      |      |      |      |  |
| futB 67:19(1198) |        | GATGATTGAGGGTTAATTATGATGATTGAGGGTTAATTATGATGATTGAGGGTTAATTATGATGATTGAGGGTTA |      |      |      |      |      |      |      |      |      |      |  |
| futB 67:20(1192) |        | GATGATTGAGGGTTAATTATGATGATTGAGGGTTAATTATGATGATTGAGGGTTAATTATGATGATTGAGGGTTA |      |      |      |      |      |      |      |      |      |      |  |
| futB 67:21(1198) |        | GATGATTGAGGGTTAATTATGATGATTGAGGGTTAATTATGATGATTGAGGGTTAATTATGATGATTGAGGGTTA |      |      |      |      |      |      |      |      |      |      |  |
| futB 67:27(1192) |        | -----                                                                       |      |      |      |      |      |      |      |      |      |      |  |

|                  | (1301) | 1301                                                                        | 1310 | 1320 | 1330 | 1340 | 1350 | 1360 | 1370 | 1380 | 1390 | 1400 |  |
|------------------|--------|-----------------------------------------------------------------------------|------|------|------|------|------|------|------|------|------|------|--|
| futA 67:18(1195) |        | -----                                                                       |      |      |      |      |      |      |      |      |      |      |  |
| futA 67:19(1131) |        | -----                                                                       |      |      |      |      |      |      |      |      |      |      |  |
| futA 67:20(1297) |        | ATTATGATGATTGAGGGTTAATTATGATGATTGAGGGTTAATTATGATGATTGAGGGTTAATTATGATGATTGAG |      |      |      |      |      |      |      |      |      |      |  |
| futA 67:21(1130) |        | -----                                                                       |      |      |      |      |      |      |      |      |      |      |  |
| futA 67:27(1297) |        | ATTATGATGATTGAGGGTTAATTATGATGATTGAGGGTTAATTATGATGATTGAGGGTTAATTATGATGATTGAG |      |      |      |      |      |      |      |      |      |      |  |
| futB 67:18(1240) |        | -----                                                                       |      |      |      |      |      |      |      |      |      |      |  |
| futB 67:19(1261) |        | -----                                                                       |      |      |      |      |      |      |      |      |      |      |  |
| futB 67:20(1192) |        | -----                                                                       |      |      |      |      |      |      |      |      |      |      |  |
| futB 67:21(1261) |        | -----                                                                       |      |      |      |      |      |      |      |      |      |      |  |
| futB 67:27(1192) |        | -----                                                                       |      |      |      |      |      |      |      |      |      |      |  |

|                  | (1401) | 1401                                                                             | 1410 | 1420 | 1430 | 1440 | 1450 | 1460 | 1470 | 1480 | 1490 | 1500 |  |
|------------------|--------|----------------------------------------------------------------------------------|------|------|------|------|------|------|------|------|------|------|--|
| futA 67:18(1195) |        | GAGCGCCTTTTGCAAAACGCTTCACCTTTATGGAATTGTCCCAAAAC                                  |      |      |      |      |      |      |      |      |      |      |  |
| futA 67:19(1131) |        | GAGCGCCTTTTGCAAAACGCTTCACCTTTATGGAATTGTCCCAAAAC                                  |      |      |      |      |      |      |      |      |      |      |  |
| futA 67:20(1397) |        | GGTTAATTATGATGATTGAGGGTTAATTATGATGATTGAGGGTTAATTATGATGATTGAGGGTTAATTATGATGATTGAG |      |      |      |      |      |      |      |      |      |      |  |
| futA 67:21(1130) |        | GAGCGCCTTTTGCAAAACGCTTCACCTTTATGGAATTGTCCCAAAAC                                  |      |      |      |      |      |      |      |      |      |      |  |
| futA 67:27(1397) |        | GGTTAATTATGATGATTGAGGGTTAATTATGATGATTGAGGGTTAATTATGATGATTGAGGGTTAATTATGATGATTGAG |      |      |      |      |      |      |      |      |      |      |  |
| futB 67:18(1240) |        | GAGCGCCTTTTGCAAAACGCTTCACCTTTATGGAATTGTCCCAAAAC                                  |      |      |      |      |      |      |      |      |      |      |  |
| futB 67:19(1261) |        | GAGCGCCTTTTGCAAAACGCTTCACCTTTATGGAATTGTCCCAAAAC                                  |      |      |      |      |      |      |      |      |      |      |  |
| futB 67:20(1192) |        | GAGCGCCTTTTGCAAAACGCTTCACCTTTATGGAATTGTCCCAAAAC                                  |      |      |      |      |      |      |      |      |      |      |  |
| futB 67:21(1261) |        | GAGCGCCTTTTGCAAAACGCTTCACCTTTATGGAATTGTCCCAAAAC                                  |      |      |      |      |      |      |      |      |      |      |  |
| futB 67:27(1192) |        | GAGCGCCTTTTGCAAAACGCTTCACCTTTATGGAATTGTCCCAAAAC                                  |      |      |      |      |      |      |      |      |      |      |  |

|                  | (1501) | 1501 | 1510                                                                       | 1520        | 1530        | 1540 | 1550 | 1560 | 1570 | 1580 | 1590 |
|------------------|--------|------|----------------------------------------------------------------------------|-------------|-------------|------|------|------|------|------|------|
| futA 67:18(1243) |        | ACCT | CTTTTAAAAATCTATCGCAAAGCTTATCAAAAATCCTTACCTTGTTCGCGCCATAGGAGATGGGTTAA       | GAAAT       | TGGGTTTGTAA |      |      |      |      |      |      |
| futA 67:19(1179) |        | ACCT | CTTTTAAAAATCTATCGCAAAGCTTATCAAAAATCCTTACCTTGTTCGCGCCATAGGAGATGGGTTAA       | GAAAT       | TGGGTTTGTAA |      |      |      |      |      |      |
| futA 67:20(1497) |        | ACCA | CTTTTAAAAATCTATCGCAAAGCTTATCAAAAATCCTTACCTTGTTCGCGTGGTGAGAAAGTTGATTAAAAAAT | TGGGTTTGTAA |             |      |      |      |      |      |      |
| futA 67:21(1178) |        | ACCT | CTTTTAAAAATCTATCGCAAAGCTTATCAAAAATCCTTACCTTGTTCGCGCCATAGGAGATGGGTTAA       | GAAAT       | TGGGTTTGTAA |      |      |      |      |      |      |
| futA 67:27(1455) |        | ACCA | CTTTTAAAAATCTATCGCAAAGCTTATCAAAAATCCTTACCTTGTTCGCGTGGTGAGAAAGTTGATTAAAAAAT | TGGGTTTGTAA |             |      |      |      |      |      |      |
| futB 67:18(1288) |        | ACCA | CTTTTAAAAATCTATCGCAAAGCTTATCAAAAATCCTTACCTTGTTCGCGTGGTGAGAAAGTTGATTAAAAAAT | AA          | -----       |      |      |      |      |      |      |
| futB 67:19(1309) |        | ACCA | CTTTTAAAAATCTATCGCAAAGCTTATCAAAAATCCTTACCTTGTTCGCGTGGTGAGAAAGTTGATTAAAAAAT | AA          | -----       |      |      |      |      |      |      |
| futB 67:20(1240) |        | ACCA | CTTTTAAAAATCTATCGCAAAGCTTATCAAAAATCCTTACCTTGTTCGCGTGGTGAGAAAGTTGATTAAAAAAT | AA          | -----       |      |      |      |      |      |      |
| futB 67:21(1309) |        | ACCA | CTTTTAAAAATCTATCGCAAAGCTTATCAAAAATCCTTACCTTGTTCGCGTGGTGAGAAAGTTGATTAAAAAAT | AA          | -----       |      |      |      |      |      |      |
| futB 67:27(1240) |        | ACCA | CTTTTAAAAATCTATCGCAAAGCTTATCAAAAATCCTTACCTTGTTCGCGTGGTGAGAAAGTTGATTAAAAAAT | AA          | -----       |      |      |      |      |      |      |
